CORRECTION

# Correction: Women's health in the occupied Palestinian territories: Contextual influences on subjective and objective health measures

The *PLoS ONE* Staff

The affiliation for the second author is incorrect. Tiziana Leone is not affiliated with #1 but with #2 Department of International Development, LSE, London, United Kingdom. The publisher apologizes for this error.

## Reference

1. Bates K, Leone T, Ghandour R, Mitwalli S, Nasr S, Coast E, et al. (2017) Women's health in the occupied Palestinian territories: Contextual influences on subjective and objective health measures. *PLoS ONE* 12(10): e0186610. <https://doi.org/10.1371/journal.pone.0186610> PMID: 29077709

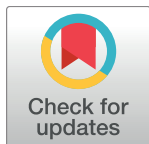

## OPEN ACCESS

**Citation:** The *PLoS ONE* Staff (2018) Correction: Women's health in the occupied Palestinian territories: Contextual influences on subjective and objective health measures. *PLoS ONE* 13(1): e0191540. <https://doi.org/10.1371/journal.pone.0191540>

**Published:** January 16, 2018

**Copyright:** © 2018 The *PLoS ONE* Staff. This is an open access article distributed under the terms of the [Creative Commons Attribution License](https://creativecommons.org/licenses/by/4.0/), which permits unrestricted use, distribution, and reproduction in any medium, provided the original author and source are credited.
